# Supplementary material
Source: publisher figshare collection journal article supplement (https://karger.figshare.com/articles/dataset/_/5128015)
Supplement: Supplementary file 1 [file 1 › 000382127_sm_Figure.pdf]

Supplementary Figure : Correlation between twice measurements of VPW

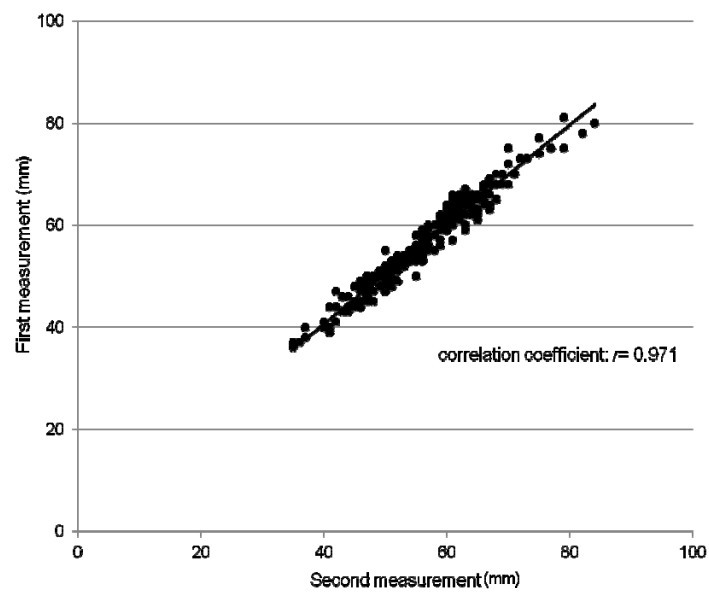

**Supplementary Figure 1. Correlation between twice measurements of VPW**

VPW was measured twice on different days under the blinded condition about patient's clinical information, and showed good consistency.
