# Supplementary material
Source: publisher figshare collection journal article supplement (https://karger.figshare.com/articles/dataset/_/5128015)
Supplement: Supplementary file 1 [file 1 › 000382127_sm_Tables.xlsx]

## Sheet: Supple Table 1
Supplementary Table 1: Data obteined from examinations performed after admission
Among these parameters, the prevalence rate of PAF and frequency of PACs were higher in CE than
non-CE groups.
While, the value of EF, the prevalence rate of severe ICA stenosis and aortic athromatous lesion were higher
in non-CE groups.
		ALL	CE groups	non-CE groups	p - value
		n=343	n=57	n=286
PAF	n (%)	28 (8.2%)	24 (42.1%)	4 (1.4%)	<0.001
PACs (Holter)	(%)	0.89±2.34	1.67±3.67	0.70±1.86	0.067
PVCs (Holter)	(%)	0.41±1.65	0.23±0.65	0.46±1.81	0.531
LAD	(mm)	36.5±5.62	37.8±7.19	36.2±5.22	0.081
EF	(%)	62.5±9.89	57.9±14.3	63.4±8.35	0.032
ICA stenosis
<50%	n (%)	272 (79.3%)	51 (89.4%)	221 (77.3%)	0.541
50-69%	n (%)	40 (11.7%)	6 (10.5%)	34 (11.8%)	0.991
≥70%	n (%)	31 (9.0%)	0 (0%)	31 (11.1%)	<0.001
TTE findings
max IMT≥4mm*	n (%)	24 (7.0%)	2 (3.5%)	22 (7.8%)	0.033
PFO	n (%)	15 (4.3%)	2 (3.5%)	13 (4.5%)	0.424
PAF: paroxysmal atrial fibrillation , PAC: premature atrial contraction , PVC: premature ventricular contraction,
EF: ejection fraction, LAD: diameter of left atrium, ICA: internal carotid artery
TTE: trans esophagial echocardiography, IMT: Intima Media Thickness, PFO: patent foramen ovale
* atheromatous lesion in aortic arch with the maximum intima media thickness over 4mm

## Sheet: Supple Table 2
Supplementary Table 2: The difference of P-max between twice measurments
measurment		Second		ALL	Concordance
	P-max	≤ 1.1	≥ 1.2		rate
First	≤ 1.1	223	9	233	0.957
	≥ 1.2	7	103	110	0.936
P-max was measured twice on different days under the blinded condition about
patient’s clinical information, and showed good consistency.
